1 **Insulin-like Growth Factor 1 Receptor Expression Correlates**  
2 **with Programmed Death Ligand 1 Expression and Poor**  
3 **Survival in Non-small Cell Lung Cancer**

4

5 Hiroaki Nagamine<sup>1,3¶</sup>, Masakazu Yashiro<sup>2\*¶</sup>, Megumi Mizutani<sup>3</sup>, Akira Sugimoto<sup>3</sup>,

6 Yoshiya Matsumoto<sup>3</sup>, Yoko Tani<sup>4</sup>, Kenji Sawa<sup>4</sup>, Hiroyasu Kaneda<sup>4</sup>, Kazuhiro Yamada<sup>3</sup>,

7 Tetsuya Watanabe<sup>3</sup>, Kazuhisa Asai<sup>3</sup>, Satoshi Suzuki<sup>5&</sup>, Tomoya Kawaguchi<sup>3,4</sup>

8

9 1 Department of Respiratory Medicine, Osaka City University, Graduate School of  
10 Medicine, Osaka, Japan

11 2 Molecular Oncology and Therapeutics, Osaka Metropolitan University, Graduate  
12 School of Medicine, Osaka, Japan

13 3 Department of Respiratory Medicine, Osaka Metropolitan University, Graduate  
14 School of Medicine, Osaka, Japan

15 4 Department of Clinical Oncology, Osaka Metropolitan University, Graduate School  
16 of Medicine, Osaka, Japan

17 5 Department of Thoracic Surgery, Osaka Metropolitan University, Graduate School  
18 of Medicine, Osaka, Japan

NOTE: This preprint reports new research that has not been certified by peer review and should not be used to guide clinical practice.

19

20 **\*Corresponding Author:**

21 Masakazu Yashiro

22 ORCID: Masakazu Yashiro (<https://orcid.org/0000-0001-5743-7228>)

23 Email: [i21496f@omu.ac.jp](mailto:i21496f@omu.ac.jp) (MY)

24

25 ¶These authors contributed equally to this work.

26 &These authors also contributed equally to this work.

27

28 **Short title: IGF1R is associated with PD-L1 expression and poor survival in**

29 **NSCLC**

30

31 **Keywords: IGF1R, lung cancer, NSCLC, OS, PD-L1, RFS**

## 32 **Abstract**

33 The insulin-like growth factor 1 receptor (IGF1R) has been associated with growth and  
34 metastasis in various cancers. However, its role in postoperative recurrence and  
35 prognosis in lung cancer lacks clear consensus. Therefore, this study aimed to  
36 investigate the potential relationship between IGF1R and postoperative recurrence as  
37 well as long-term survival in a large cohort. Additionally, we assessed the relationship  
38 between IGF1R and programmed death ligand 1 (PD-L1) expression. Our study  
39 encompassed 782 patients with non-small cell lung cancer (NSCLC). Immunostaining  
40 of surgical specimens was performed to evaluate IGF1R and PD-L1 expression. Among  
41 the patients, 279 (35.8%) showed positive IGF1R expression, with significantly worse  
42 relapse-free survival (RFS) and overall survival (OS). Notably, no significant  
43 differences in RFS and OS were observed between IGF1R-positive and -negative  
44 groups in stages 2 and 3. However, in the early stages (0-1), the positive group  
45 displayed significantly worse RFS and OS. In addition, PD-L1 expression was detected  
46 in 100 (12.8%) patients, with a significant predominance in the IGF1R-positive. IGF1R  
47 may serve as a prognostic indicator and a guide for perioperative treatment strategies in  
48 early-stage lung cancer. In conclusion, our findings underscore an association between  
49 IGF1R expression and poor survival and PD-L1 expression in NSCLC.

## 50 **Introduction**

51           The insulin-like growth factor 1 receptor (IGF1R) is expressed in various  
52 cancers [1-3] and is associated with cancer growth [4], metastasis [5, 6], and  
53 malignancy [7, 8]. In lung cancer, particularly non-small cell lung cancer (NSCLC),  
54 IGF1R expression is associated with carcinogenesis and proliferation [9, 10].  
55 Nevertheless, the association between IGF1R expression and postoperative prognosis as  
56 well as recurrence in lung cancer has been inconsistent [11-14], lacking a definitive  
57 consensus.

58           In recent years, the expression of programmed death ligand 1 (PD-L1) has  
59 attracted attention as a predictor of immune checkpoint inhibitor (ICI) efficacy in the  
60 treatment of lung cancer [15]. Although the expression of IGF1R and PD-L1 has been  
61 implicated in head and neck squamous cell carcinoma [16], their role in lung cancer  
62 remains unknown. The development of lung cancers, particularly squamous cell  
63 carcinoma (SCC), has been associated with smoking [17]. Moreover, smoking is known  
64 to be involved in tumor-induced IGF1R expression [10]. However, it remains unclear  
65 whether IGF1R expression is associated with smoking and PD-L1 expression in actual  
66 clinical practice and whether it is involved in postoperative recurrence and survival in  
67 lung cancer. Therefore, this study aimed to investigate the potential associations

68 between IGF1R expression, PD-L1 expression, smoking history, postoperative  
69 recurrence, and survival in lung cancer. To our knowledge, this is the first study to  
70 comprehensively evaluate the relationship between IGF1R and these critical factors  
71 using long-term observations on a large scale. We anticipate that our findings will  
72 contribute to the ongoing efforts to optimize lung cancer management, leading to more  
73 effective and personalized therapeutic interventions in the realm of precision medicine.

## 74 **Materials and methods**

### 75 **Patient and data collection**

76 A total of 782 patients with NSCLC who underwent surgery at the Osaka  
77 Metropolitan University Hospital between January 2010 and December 2019 were  
78 included in this study. Cancer stage for all patients was assessed according to the Union  
79 for International Cancer Control, 8th edition. Relapse-free survival (RFS) was  
80 calculated from the date of surgery to the date of first recurrence or death from any  
81 cause. Overall survival (OS) was calculated from the date of surgery to the date of death  
82 from any cause. Our observations were conducted retrospectively, with August 31,  
83 2023, as the data cutoff date, spanning a maximum of 10 years. At the cut-off date or 10  
84 years after the start of observation, cases with no events were terminated from  
85 observation. Between September 1, 2023, and October 31, 2023, we accessed medical  
86 records for the collection of information, including personally identifiable details,  
87 related to registered patients. This study was approved by the Osaka City university  
88 Ethics Committee (reference number 2019-006). Informed consent was obtained from  
89 each patient. This study has been conducted according to the principles of the  
90 declaration of Helsinki.

### 91 **Immunohistochemistry**

92            Immunohistochemical staining was performed on paraffin-embedded sections  
93 of primary surgically resected specimens obtained from patients with NSCLC. Slides  
94 were deparaffinized using xylene and rehydrated with gradually decreasing  
95 concentrations of ethyl alcohol. The slides were then incubated with methanol  
96 containing 3% hydrogen peroxide at room temperature for 15 min to eliminate  
97 endogenous peroxidase activity. Subsequently, the slides were heated in an autoclave at  
98 105°C for 10 min in Target Retrieval Solution (Dako, Santa Clara, CA, USA).  
99 Following this, the slides were blocked with 10% normal mouse serum for 10 min at  
100 room temperature and incubated overnight at 4°C with the anti-IGF1R antibody  
101 (NB110-87052, 1:200; Novus Biologicals LLC, Centennial, CO, USA). Subsequently,  
102 the samples were incubated with a biotinylated secondary antibody for 10 min at room  
103 temperature, followed by treatment with streptavidin-peroxidase reagent for 5 min at  
104 room temperature, incubation in diaminobenzidine for 2 min at room temperature, and  
105 counterstaining with 100% Mayer's hematoxylin for 40 s at room temperature. For PD-  
106 L1 staining, sections were blocked with 10% normal rabbit serum, and an anti-PD-L1  
107 antibody (ab205921, 1:150, Abcam, Cambridge, UK) was used as the primary antibody,  
108 followed by reaction with diaminobenzidine for 7 min.

## 109 **Statistical analysis**

110           The  $\chi^2$  test was employed to evaluate the significance of differences in patient  
111 characteristics between the IGF1R-positive and IGF1R-negative groups. Multiple  
112 logistic regression analysis was utilized to analyze the relationship between IGF1R and  
113 PD-L1 expression, incorporating factors age, sex, smoking history, Eastern Cooperative  
114 Oncology Group Performance Status (ECOG PS), histology, pStage, pleural invasion,  
115 lymphatic invasion, and vascular invasion. The Mann–Whitney U test was applied to  
116 evaluate differences in smoking index or maximum tumor diameter between the IGF1R-  
117 positive and negative groups. Survival curves were generated using Kaplan–Meier  
118 method, and the log-rank test was used to compare cumulative survival durations in the  
119 patient groups. In addition, the Cox proportional hazards model was used to compute  
120 univariable and multivariable hazard ratios for the study parameters. Analyses were  
121 performed using EZR in R Commander version 1.54 (Saitama Medical Center, Jichi  
122 Medical University, Saitama, Japan). In all tests,  $p < 0.05$  was considered to indicate  
123 statistical significance.



## 124 **Results**

### 125 **Patient characteristics and the association of IGF1R expression with** 126 **smoking history and tumor size**

127 A total of 782 patients were included in this study. Both IGF1R and PD-L1  
128 were predominantly stained in the cytoplasm (Fig. 1A and 1B). IGF1R was identified as  
129 positive in 279 patients (35.8%). The median age of the participants was 70.0 years  
130 (range=33-91), with 497 (63.6%) patients being male. Five hundred twenty-one patients  
131 had adenocarcinoma, 217 had SCC, 14 had adenosquamous cell carcinoma, 11 had  
132 large cell carcinoma, nine had pleomorphic carcinoma, three had large cell  
133 neuroendocrine carcinoma, two had adenocarcinoma in situ, one had mixed  
134 adenocarcinoma and small cell carcinoma, one had SCC and small cell carcinoma, one  
135 had NSCLC not otherwise specified, one had mucoepidermoid carcinoma, and one had  
136 atypical adenomatous hyperplasia. The IGF1R-positive group exhibited significantly  
137 higher proportions of patients who were  $\geq 65$  years old, male, had a smoking history, a  
138 performance status (PS)  $\geq 1$ , had SCC, pStage $\geq 2$ , exhibited pleural invasion, had  
139 vascular invasion, or showed PD-L1 expression (all  $p < 0.01$ ,  $p < 0.01$ ,  $p < 0.01$ ,  $p < 0.01$ ,  
140  $p < 0.01$ ,  $p < 0.01$ ,  $p = 0.02$ ,  $p < 0.01$ ,  $p < 0.01$ , respectively) (Table 1). Multivariable analysis  
141 revealed that PD-L1 expression is associated with IGF1R expression (Table 2). Both

142 IGF1R-positive and PD-L1-positive group had a significantly higher smoking index  
143 ( $p<0.01$ ) (Fig. 2A and 2 B), and the IGF1R-positive group had a significantly larger  
144 maximum tumor diameter ( $p<0.01$ ) (Fig. 2C).

145 **Fig 1. Immunostaining for IGF1R and PD-L1.**

146 **(A)** Immunostaining for IGF1R reveals predominant cytoplasmic staining. **(B)**  
147 Immunostaining for PD-L1 reveals predominant cytoplasmic staining.

148 **Table 1. Patient characteristics.**

|                         | No. of all patients<br>n=782 | IGF1R positive<br>n=279 (35.8%) | IGF1R negative<br>n= 503 (64.2%) | p-value |
|-------------------------|------------------------------|---------------------------------|----------------------------------|---------|
| <b>Age</b>              |                              |                                 |                                  |         |
| <65                     | 200 (25.6%)                  | 50 (17.9%)                      | 150 (29.8%)                      | <0.01   |
| ≥65                     | 582 (74.4%)                  | 229 (82.1%)                     | 353 (70.2%)                      |         |
| <b>Sex</b>              |                              |                                 |                                  |         |
| Male                    | 497 (63.6%)                  | 210 (75.3%)                     | 287 (57.1%)                      | <0.01   |
| Female                  | 285 (36.4%)                  | 69 (24.7%)                      | 216 (42.9%)                      |         |
| <b>Smoking history</b>  |                              |                                 |                                  |         |
| Current/Former          | 587 (75.1%)                  | 243 (87.1%)                     | 344 (68.4%)                      | <0.01   |
| Never                   | 195 (24.9%)                  | 36 (12.9%)                      | 159 (31.6%)                      |         |
| <b>ECOG PS</b>          |                              |                                 |                                  |         |
| 0                       | 573 (73.3%)                  | 193 (68.8%)                     | 380 (75.4%)                      | <0.01   |
| 1-3                     | 115 (14.7%)                  | 56 (20.2%)                      | 59 (11.7%)                       |         |
| <b>Histology</b>        |                              |                                 |                                  |         |
| Sq                      | 218 (27.9%)                  | 137 (49.1%)                     | 81 (16.1%)                       | <0.01   |
| Non Sq                  | 564 (72.1%)                  | 142 (50.9%)                     | 422 (83.9%)                      |         |
| <b>pStage</b>           |                              |                                 |                                  |         |
| 0-1                     | 494 (63.2%)                  | 137 (49.1%)                     | 357 (71.0%)                      | <0.01   |
| 2-3                     | 288 (36.8%)                  | 142 (50.9%)                     | 146 (29.0%)                      |         |
| <b>Adjuvant therapy</b> |                              |                                 |                                  |         |
| Done                    | 192 (24.6%)                  | 72 (25.8%)                      | 120 (23.9%)                      | 0.55    |
| None                    | 590 (75.4%)                  | 207 (74.2%)                     | 383 (76.1%)                      |         |
| <b>Pleural invasion</b> |                              |                                 |                                  |         |

|                    |             |             |             |       |
|--------------------|-------------|-------------|-------------|-------|
| Positive           | 228 (29.2%) | 96 (34.4%)  | 132 (26.2%) | 0.02  |
| Negative           | 548 (70.1%) | 181 (64.9%) | 367 (73.0%) |       |
| Lymphatic invasion |             |             |             |       |
| Positive           | 212 (27.1%) | 78 (28.0%)  | 134 (26.6%) | 0.74  |
| Negative           | 566 (72.4%) | 200 (71.7%) | 366 (72.8%) |       |
| Vascular invasion  |             |             |             |       |
| Positive           | 169 (21.6%) | 98 (35.1%)  | 71 (14.1%)  | <0.01 |
| Negative           | 609 (77.9%) | 180 (64.5%) | 429 (85.3%) |       |
| PD-L1              |             |             |             |       |
| Positive           | 100 (12.8%) | 68 (24.4%)  | 32 (6.4%)   | <0.01 |
| Negative           | 682 (87.2%) | 211 (75.6%) | 471 (93.6%) |       |

149 IGF1R, insulin-like growth factor 1 receptor; ECOG PS, Eastern Cooperative Oncology

150 Group Performance Status; Sq, squamous cell carcinoma; PD-L1, programmed death

151 ligand 1.

152 **Table 2. Multivariate analysis of the relationship between IGF1R expression and**

153 **PD-L1 expression.**

| Factor | Reference | OR (95%CI)       | p-value |
|--------|-----------|------------------|---------|
| PD-L1  | Negative  | 3.35 (1.95-5.73) | <0.01   |

154 IGF1R, insulin-like growth factor 1 receptor; OR, odds ratio; CI, confidence intervals;

155 PD-L1, programmed death ligand 1.

156 **Fig 2. The association between IGF1R or PD-L1 and smoking index, as well as the**  
157 **correlation between IGF1R and tumor size.**

158 (A) Comparison of smoking index between the IGF1R-positive and negative groups.  
159 The IGF1R-positive group had a significantly larger smoking index. (B) Comparison of  
160 smoking index between PD-L1-positive and negative groups. The PD-L1-positive group  
161 had a significantly larger smoking index. (C) Comparison of maximum tumor diameter  
162 between IGF1R-positive and negative groups. The IGF1R-positive group had a  
163 significantly larger maximum tumor diameter.

164 **Relationship between IGF1R and relapse-free survival or overall**  
165 **survival**

166 In all patients, IGF1R positivity was associated with worse RFS ( $p < 0.01$ ) and  
167 OS ( $p < 0.01$ ) (Fig. 3A and 3B). When evaluated by stage, IGF1R positivity was  
168 associated with worse RFS ( $p < 0.01$ ) and OS ( $p < 0.01$ ) in Stage 0-1 (Fig. 4A and 4B).  
169 However, no significant differences in RFS or OS were observed between IGF1R-  
170 positive and negative patients in Stage 2 ( $p = 0.60$  and  $p = 0.80$ , respectively) (Fig. 5A and  
171 5B) or Stage 3 ( $p = 0.89$  and  $p = 0.15$ , respectively) (Fig. 6A and 6B). In univariable  
172 analysis of RFS in stage 0-1 patients, IGF1R positivity, male, smoking history, ECOG  
173 PS  $\geq 1$ , pStage 2-3, pleural invasion, lymphatic invasion, and vascular invasion were all

174 associated with significantly worse PFS (Table 3). In the multivariable analysis of RFS  
175 in stage 0-1 patients, smoking history, ECOG PS $\geq$ 1, lymphatic invasion, and vascular  
176 invasion were associated with significantly worse PFS (Table 3). In univariable analysis  
177 of OS in stage 0-1 patients, IGF1R positivity, male, smoking history, ECOG PS $\geq$ 1, SCC  
178 and vascular invasion were all associated with significantly worse OS (Table 4). In the  
179 multivariable analysis of OS in stage 0-1 patients, ECOG PS $\geq$ 1 was associated with  
180 significantly worse OS (Table 4).

181 **Fig 3. Kaplan-Meier curve depicting RFS and OS for all patients.**

182 (A) Kaplan-Meier curve depicting RFS for all patients. The IGF1R-positive group  
183 exhibited significantly worse RFS. (B) Kaplan-Meier curve depicting OS for all  
184 patients. The IGF1R-positive group exhibited significantly worse OS.

185 **Fig 4. Kaplan-Meier curve depicting RFS and OS in stage 0-1 patients.**

186 (A) Kaplan-Meier curve depicting RFS in stage 0-1 patients. The IGF1R-positive group  
187 exhibited significantly worse RFS. (B) Kaplan-Meier curve depicting OS in stage 0-1  
188 patients. The IGF1R-positive group exhibited significantly worse OS.

189 **Fig 5. Kaplan-Meier curve depicting RFS and OS in stage 2 patients.**

190 (A) Kaplan-Meier curve depicting RFS in stage 2 patients. No significant difference was  
191 observed between the IGF1R-positive and negative groups. (B) Kaplan-Meier curve for

192 OS in stage 2 patients. No significant difference was observed between the IGF1R-  
193 positive and negative groups.

194 **Fig 6. Kaplan-Meier curve depicting RFS and OS in stage 3 patients.**

195 **(A)** Kaplan-Meier curve depicting RFS in stage 3 patients. No significant difference in  
196 RFS was observed between the IGF1R-positive and negative groups. **(B)** Kaplan-Meier  
197 curve depicting OS in stage 3 patients. No significant difference was observed between  
198 the IGF1-positive and negative groups.

199 **Table 3. Multivariable analysis of RFS in stage 0-1 patients.**

| Factor           | Reference | RFS of stage 0-1 patients (n=494) |           |         |                        |           |         |
|------------------|-----------|-----------------------------------|-----------|---------|------------------------|-----------|---------|
|                  |           | Univariable analysis              |           |         | Multivariable analysis |           |         |
|                  |           | HR                                | 95%CI     | p-value | HR                     | 95%CI     | p-value |
| IGF1R            | Negative  | 1.71                              | 1.23-2.40 | <0.01   | 1.29                   | 0.85-1.96 | 0.23    |
| Age              | ≤64       | 1.34                              | 0.91-1.95 | 0.14    |                        |           |         |
| Sex              | Female    | 2.05                              | 1.45-2.89 | <0.01   | 1.35                   | 0.87-2.11 | 0.18    |
| Smoking history  | Never     | 2.41                              | 1.62-3.58 | <0.01   | 1.75                   | 1.04-2.95 | 0.04    |
| ECOG PS          | 0         | 2.13                              | 1.37-3.30 | <0.01   | 2.05                   | 1.30-3.23 | <0.01   |
| Histology        | NonSq     | 1.52                              | 1.05-2.21 | 0.03    | 0.73                   | 0.45-1.18 | 0.20    |
| Adjuvant therapy | Done      | 0.66                              | 0.66-1.68 | 0.84    |                        |           |         |
| Pleural invasion | Negative  | 1.93                              | 1.35-2.76 | <0.01   | 1.32                   | 0.87-2.04 | 0.19    |

|                    |          |      |           |       |      |           |       |
|--------------------|----------|------|-----------|-------|------|-----------|-------|
| Lymphatic invasion | Negative | 2.26 | 1.57-3.25 | <0.01 | 1.70 | 1.10-2.63 | 0.02  |
| Vascular invasion  | Negative | 2.68 | 1.80-3.98 | <0.01 | 1.91 | 1.17-3.12 | <0.01 |
| PD-L1              | Negative | 1.49 | 0.90-2.47 | 0.12  |      |           |       |

200 RFS, relapse-free survival; HR, hazard ratio; CI, confidence intervals; IGF1R, insulin-  
 201 like growth factor 1 receptor; ECOG PS, Eastern Cooperative Oncology Group  
 202 Performance Status; Sq, squamous cell carcinoma; PD-L1, programmed death ligand 1.

203 **Table 4. Multivariable analysis of OS in stage 0-1 patients.**

| OS of stage 0-1 patients (n=494) |           |                      |           |         |                        |           |         |
|----------------------------------|-----------|----------------------|-----------|---------|------------------------|-----------|---------|
| Factor                           | Reference | Univariable analysis |           |         | Multivariable analysis |           |         |
|                                  |           | HR                   | 95%CI     | p-value | HR                     | 95%CI     | p-value |
| IGF1R                            | Negative  | 1.98                 | 1.35-2.91 | <0.01   | 1.40                   | 0.86-2.29 | 0.17    |
| Age                              | ≤64       | 1.26                 | 0.81-1.94 | 0.31    |                        |           |         |
| Sex                              | Female    | 2.79                 | 1.82-4.29 | <0.01   | 1.69                   | 0.99-2.91 | 0.06    |
| Smoking history                  | Never     | 2.81                 | 1.73-4.57 | <0.01   | 1.70                   | 0.90-3.21 | 0.10    |
| ECOG PS                          | 0         | 2.61                 | 1.60-4.28 | <0.01   | 2.24                   | 1.34-3.73 | <0.01   |
| Histology                        | NonSq     | 2.10                 | 1.39-3.16 | <0.01   | 0.95                   | 0.55-1.64 | 0.86    |
| Adjuvant therapy                 | Done      | 1.14                 | 0.65-1.99 | 0.65    |                        |           |         |
| Pleural invasion                 | Negative  | 1.34                 | 0.86-2.09 | 0.20    |                        |           |         |
| Lymphatic invasion               | Negative  | 1.39                 | 0.86-2.23 | 0.18    |                        |           |         |
| Vascular invasion                | Negative  | 2.19                 | 1.36-3.53 | <0.01   | 1.52                   | 0.85-2.70 | 0.15    |



|       |          |      |           |      |
|-------|----------|------|-----------|------|
| PD-L1 | Negative | 1.71 | 0.98-3.01 | 0.06 |
|-------|----------|------|-----------|------|

---

204 OS, overall survival; HR, hazard ratio; CI, confidence intervals; IGF1R, insulin-like  
205 growth factor 1 receptor; ECOG PS, Eastern Cooperative Oncology Group Performance  
206 Status; Sq, squamous cell carcinoma; PD-L1, programmed death ligand 1.

## 207 **Discussion**

208           Although previous reports have not consistently linked IGF1R expression to  
209 postoperative recurrence or prognosis in lung cancer [11-14], our large-scale, long-term  
210 observational study demonstrates that IGF1R expression is associated with worse RFS  
211 and OS, particularly in the early stages. In addition, in this study, IGF1R expression was  
212 significantly correlated with PD-L1 expression, smoking history, and tumor size.

213           The IGF1R-positive group also showed significantly larger tumor sizes. IGF1R  
214 is a factor associated with tumor growth [4], consistent with a relationship between  
215 IGF1R expression and tumor size. In addition, IGF1R expression was associated with  
216 shorter RFS and OS, particularly in early-stage lung cancer. Many treatment strategies  
217 using ICI for neoadjuvant and adjuvant chemotherapy have been developed in recent  
218 years [18, 19]. However, due to the favorable prognosis of early-stage lung cancer, it  
219 was less amenable to the benefits of neoadjuvant and adjuvant chemotherapy. Based on  
220 our study findings, IGF1R expression may serve as an informative marker for  
221 determining appropriate perioperative chemotherapy for patients with early-stage lung  
222 cancer. Furthermore, despite promising preclinical indications, IGF1R inhibitors have  
223 not proven consistently effective in various types of cancer in clinical trials [20-22].  
224 However, recent mouse experiments have revealed that reduced IGF1R expression

225 enhances the effects of ICI [23], and that IGF1R expression correlates with the tumor  
226 microenvironment [24], including immune cells. Combining IGF1R inhibitors with ICI  
227 may hold promise for future therapies, especially as perioperative treatment for early-  
228 stage lung cancer.

229           In this study, we observed a positive correlation between the expression of  
230 IGF1R and PD-L1. Notably, in head and neck squamous cell carcinoma, where smoking  
231 poses a risk [25], Interleukin-6 (IL-6) has been reported to upregulate IGF1R and PD-  
232 L1 expression [16]. In the present study, the IGF1R-positive group had a significantly  
233 higher smoking index, consistent with previous studies linking IGF1R expression to  
234 smoking [14]. Smoking induces IL-6 expression in the lungs [26], potentially  
235 contributing to the upregulation of both IGF1R and PD-L1 expression in lung cancer.  
236 Additionally, the IGF1R-positive group had a significantly higher proportion of SCC,  
237 widely known to be associated with smoking [17]. Smoking-induced inflammation also  
238 enhances COX2 expression, which is associated with IGF1R expression in lung cancer  
239 [10]. Various smoking-related mechanisms, such as IL-6 and COX-2, may elucidate the  
240 association between IGF1R expression, smoking, SCC, and PD-L1 expression.  
241 However, further research is needed to elucidate the mechanism of co-expression of  
242 IGF1R and PD-L1. Our unpublished data indicate that OMUL-1, a human squamous

243 lung cancer cell line, expresses high levels of both IGF1R and PD-L1. This cell line  
244 may be useful for analyzing the mechanisms responsible for the co-expression of  
245 IGF1R and PD-L1.

246 IGF1R expression was correlated with various factors, such as PD-L1, sex, and  
247 age, which differed between the IGF1R-positive and negative groups. Additionally,  
248 IGF1R expression was positively correlated with smoking index. Given the high  
249 prevalence of male smokers in Japan [27], the prevalence of IGF1R-positive lung  
250 cancer may be higher in males. Moreover, the smoking index tends to be higher in older  
251 patients, and the population of nonsmokers has decreased in recent years [27], which  
252 may explain the large number of older adults in the IGF1R-positive group.

253 One limitation of this study stems from its retrospective design. Further  
254 research and prospective study are necessary to fully understand the clinical  
255 implications of IGF1R expression.

256 In conclusion, our study reveals that higher IGF1R expression correlates with  
257 poorer outcomes in terms of RFS and OS, particularly in patients with early-stage lung  
258 cancer. Furthermore, our findings indicate a relationship between IGF1R expression in  
259 lung cancer and several factors: PD-L1 expression, smoking history, and tumor size.

## 260 **Acknowledgment**

261 We express our gratitude to Akiko Tsuda from the Molecular Oncology and  
262 Therapeutics department at Osaka Metropolitan University Graduate School of  
263 Medicine for her valuable technical assistance.

## 264 **Author contributions**

265 Hiroaki Nagamine; conceptualization, data curation, formal analysis, investigation,  
266 methodology, validation, visualization, writing original draft, writing review and editing  
267 Masakazu Yashiro; conceptualization, data curation, formal analysis, investigation,  
268 methodology, project administration, supervision, validation, visualization, writing  
269 original draft, review and editing,  
270 Megumi Mizutani; data curation, formal analysis, investigation, validation, review and  
271 editing  
272 Akira Sugimoto; data curation, formal analysis, investigation, validation, review and  
273 editing  
274 Yoshiya Matsumoto; methodology, review and editing  
275 Yoko Tani; review and editing  
276 Kenji Sawa; methodology, review and editing  
277 Hiroyasu Kaneda; methodology, review and editing

278 Kazuhiro Yamada; methodology, validation, supervision, review and editing

279 Tetsuya Watanabe; supervision, review and editing

280 Kazuhisa Asai; supervision, review and editing

281 Satoshi Suzuki; data curation, formal analysis, investigation, validation, review and

282 editing

283 Tomoya Kawaguchi; review and editing

## 284 **Competing interests**

285 The authors declare no competing interests.

## 286 **Ethics declarations**

287 This study was approved by the Osaka City university Ethics Committee (reference

288 number 2019-006). Informed consent was obtained from the patient. This study has

289 been conducted according to the principles of the declaration of Helsinki.

## 290 **References**

291

- 292 1. Wu J, Yu E. Insulin-like growth factor receptor-1 (IGF-IR) as a target for prostate cancer  
293 therapy. *Cancer Metastasis Rev.* 2014;33(2-3):607-17. doi: 10.1007/s10555-013-9482-0.  
294 PubMed PMID: 24414227; PubMed Central PMCID: PMC4096322.
- 295 2. Motallebnezhad M, Aghebati-Maleki L, Jadidi-Niaragh F, Nickho H, Samadi-Kafil H,  
296 Shamsasenjan K, et al. The insulin-like growth factor-I receptor (IGF-IR) in breast cancer: biology  
297 and treatment strategies. *Tumour Biol.* 2016;37(9):11711-21. Epub 20160721. doi:  
298 10.1007/s13277-016-5176-x. PubMed PMID: 27444280.
- 299 3. Hu L, Xu X, Li Q, Chen X, Yuan X, Qiu S, et al. Caveolin-1 increases glycolysis in  
300 pancreatic cancer cells and triggers cachectic states. *Faseb j.* 2021;35(8):e21826. doi:  
301 10.1096/fj.202100121RRR. PubMed PMID: 34320244.
- 302 4. Heidegger I, Kern J, Ofer P, Klocker H, Massoner P. Oncogenic functions of IGF1R and  
303 INSR in prostate cancer include enhanced tumor growth, cell migration and angiogenesis.  
304 *Oncotarget.* 2014;5(9):2723-35. doi: 10.18632/oncotarget.1884. PubMed PMID: 24809298;  
305 PubMed Central PMCID: PMC4058040.
- 306 5. Xu XL, Guo AX, Pan QY, Chang AL, Zhao CR. MiR-99a suppresses cell migration and  
307 invasion by regulating IGF1R in gastric cancer. *Eur Rev Med Pharmacol Sci.* 2019;23(17):7375-  
308 82. doi: 10.26355/eurrev\_201909\_18845. PubMed PMID: 31539124.
- 309 6. Alfaro-Arnedo E, López IP, Piñeiro-Hermida S, Canalejo M, Gotera C, Sola JJ, et al.  
310 IGF1R acts as a cancer-promoting factor in the tumor microenvironment facilitating lung  
311 metastasis implantation and progression. *Oncogene.* 2022;41(28):3625-39. Epub 20220610. doi:  
312 10.1038/s41388-022-02376-w. PubMed PMID: 35688943; PubMed Central PMCID:  
313 PMC9184253.
- 314 7. Joehlin-Price AS, Stephens JA, Zhang J, Backes FJ, Cohn DE, Suarez AA. Endometrial  
315 Cancer Insulin-Like Growth Factor 1 Receptor (IGF1R) Expression Increases with Body Mass  
316 Index and Is Associated with Pathologic Extent and Prognosis. *Cancer Epidemiol Biomarkers Prev.*  
317 2016;25(3):438-45. Epub 20151218. doi: 10.1158/1055-9965.Epi-15-1145. PubMed PMID:  
318 26682991; PubMed Central PMCID: PMC45075967.
- 319 8. Du P, Liu F, Liu Y, Shao M, Li X, Qin G. Linc00210 enhances the malignancy of thyroid  
320 cancer cells by modulating miR-195-5p/IGF1R/Akt axis. *J Cell Physiol.* 2020;235(2):1001-12.  
321 Epub 20190625. doi: 10.1002/jcp.29016. PubMed PMID: 31240707.
- 322 9. Xu X, Qiu Y, Chen S, Wang S, Yang R, Liu B, et al. Different Roles of the Insulin-like  
323 Growth Factor (IGF) Axis in Non-small Cell Lung Cancer. *Curr Pharm Des.* 2022;28(25):2052-

- 324 64. doi: 10.2174/1381612828666220608122934. PubMed PMID: 36062855.
- 325 10. Pöld M, Krysan K, Pöld A, Dohadwala M, Heuze-Vourc'h N, Mao JT, et al.  
326 Cyclooxygenase-2 modulates the insulin-like growth factor axis in non-small-cell lung cancer.  
327 *Cancer Res.* 2004;64(18):6549-55. doi: 10.1158/0008-5472.Can-04-1225. PubMed PMID:  
328 15374967.
- 329 11. Dziadziuszko R, Merrick DT, Witta SE, Mendoza AD, Szostakiewicz B, Szymanowska  
330 A, et al. Insulin-like growth factor receptor 1 (IGF1R) gene copy number is associated with survival  
331 in operable non-small-cell lung cancer: a comparison between IGF1R fluorescent in situ  
332 hybridization, protein expression, and mRNA expression. *J Clin Oncol.* 2010;28(13):2174-80.  
333 Epub 20100329. doi: 10.1200/jco.2009.24.6611. PubMed PMID: 20351332; PubMed Central  
334 PMCID: PMCPMC2860435.
- 335 12. Gately K, Forde L, Cuffe S, Cummins R, Kay EW, Feuerhake F, et al. High coexpression  
336 of both EGFR and IGF1R correlates with poor patient prognosis in resected non-small-cell lung  
337 cancer. *Clin Lung Cancer.* 2014;15(1):58-66. Epub 20131107. doi: 10.1016/j.clcc.2013.08.005.  
338 PubMed PMID: 24210543.
- 339 13. Nakagawa M, Uramoto H, Oka S, Chikaishi Y, Iwanami T, Shimokawa H, et al. Clinical  
340 significance of IGF1R expression in non-small-cell lung cancer. *Clin Lung Cancer.*  
341 2012;13(2):136-42. Epub 20111201. doi: 10.1016/j.clcc.2011.10.006. PubMed PMID: 22133293.
- 342 14. Zhao S, Qiu Z, He J, Li L, Li W. Insulin-like growth factor receptor 1 (IGF1R) expression  
343 and survival in non-small cell lung cancer patients: a meta-analysis. *Int J Clin Exp Pathol.*  
344 2014;7(10):6694-704. Epub 20140915. PubMed PMID: 25400749; PubMed Central PMCID:  
345 PMCPMC4230063.
- 346 15. Yu H, Boyle TA, Zhou C, Rimm DL, Hirsch FR. PD-L1 Expression in Lung Cancer. *J*  
347 *Thorac Oncol.* 2016;11(7):964-75. Epub 20160423. doi: 10.1016/j.jtho.2016.04.014. PubMed  
348 PMID: 27117833; PubMed Central PMCID: PMCPMC5353357.
- 349 16. Li J, Xiao Y, Yu H, Jin X, Fan S, Liu W. Mutual connected IL-6, EGFR and LIN28/Let7-  
350 related mechanisms modulate PD-L1 and IGF upregulation in HNSCC using immunotherapy.  
351 *Front Oncol.* 2023;13:1140133. Epub 20230412. doi: 10.3389/fonc.2023.1140133. PubMed  
352 PMID: 37124491; PubMed Central PMCID: PMCPMC10130400.
- 353 17. Wang X, Wang T, Hua J, Cai M, Qian Z, Wang C, et al. Histological types of lung cancer  
354 attributable to fine particulate, smoking, and genetic susceptibility. *Sci Total Environ.*  
355 2023;858(Pt 2):159890. Epub 20221102. doi: 10.1016/j.scitotenv.2022.159890. PubMed PMID:  
356 36334679.
- 357 18. Forde PM, Spicer J, Lu S, Provencio M, Mitsudomi T, Awad MM, et al. Neoadjuvant  
358 Nivolumab plus Chemotherapy in Resectable Lung Cancer. *N Engl J Med.* 2022;386(21):1973-85.  
359 Epub 20220411. doi: 10.1056/NEJMoa2202170. PubMed PMID: 35403841; PubMed Central



- 360 PMCID: PMCPMC9844511.
- 361 19. Felip E, Altorki N, Zhou C, Csőszi T, Vynnychenko I, Goloborodko O, et al. Adjuvant  
362 atezolizumab after adjuvant chemotherapy in resected stage IB-IIIa non-small-cell lung cancer  
363 (IMpower010): a randomised, multicentre, open-label, phase 3 trial. *Lancet*.  
364 2021;398(10308):1344-57. Epub 20210920. doi: 10.1016/s0140-6736(21)02098-5. PubMed  
365 PMID: 34555333.
- 366 20. Qu X, Wu Z, Dong W, Zhang T, Wang L, Pang Z, et al. Update of IGF-1 receptor  
367 inhibitor (ganitumab, dalotuzumab, cixutumumab, teprotumumab and figitumumab) effects on  
368 cancer therapy. *Oncotarget*. 2017;8(17):29501-18. doi: 10.18632/oncotarget.15704. PubMed  
369 PMID: 28427155; PubMed Central PMCID: PMCPMC5438747.
- 370 21. Chiappori AA, Otterson GA, Dowlati A, Traynor AM, Horn L, Owonikoko TK, et al. A  
371 Randomized Phase II Study of Linsitinib (OSI-906) Versus Topotecan in Patients With Relapsed  
372 Small-Cell Lung Cancer. *Oncologist*. 2016;21(10):1163-4. Epub 20160930. doi:  
373 10.1634/theoncologist.2016-0220. PubMed PMID: 27694157; PubMed Central PMCID:  
374 PMCPMC5061534.
- 375 22. Fassnacht M, Berruti A, Baudin E, Demeure MJ, Gilbert J, Haak H, et al. Linsitinib (OSI-  
376 906) versus placebo for patients with locally advanced or metastatic adrenocortical carcinoma: a  
377 double-blind, randomised, phase 3 study. *Lancet Oncol*. 2015;16(4):426-35. Epub 20150318. doi:  
378 10.1016/s1470-2045(15)70081-1. PubMed PMID: 25795408.
- 379 23. Ajona D, Ortiz-Espinosa S, Lozano T, Exposito F, Calvo A, Valencia K, et al. Short-term  
380 starvation reduces IGF-1 levels to sensitize lung tumors to PD-1 immune checkpoint blockade.  
381 *Nat Cancer*. 2020;1(1):75-85. Epub 20200113. doi: 10.1038/s43018-019-0007-9. PubMed  
382 PMID: 35121837.
- 383 24. Galifi CA, Wood TL. Insulin-like growth factor-1 receptor crosstalk with integrins,  
384 cadherins, and the tumor microenvironment: sticking points in understanding IGF1R function in  
385 cancer. *Endocr Relat Cancer*. 2023;30(10). Epub 20230825. doi: 10.1530/erc-23-0031. PubMed  
386 PMID: 37490874.
- 387 25. Hayes RB, Ahn J, Fan X, Peters BA, Ma Y, Yang L, et al. Association of Oral Microbiome  
388 With Risk for Incident Head and Neck Squamous Cell Cancer. *JAMA Oncol*. 2018;4(3):358-65.  
389 doi: 10.1001/jamaoncol.2017.4777. PubMed PMID: 29327043; PubMed Central PMCID:  
390 PMCPMC5885828.
- 391 26. Francus T, Romano PM, Manzo G, Fonacier L, Arango N, Szabo P. IL-1, IL-6, and  
392 PDGF mRNA expression in alveolar cells following stimulation with a tobacco-derived antigen.  
393 *Cell Immunol*. 1992;145(1):156-74. doi: 10.1016/0008-8749(92)90320-o. PubMed PMID:  
394 1423641.
- 395 27. Tanaka H, Mackenbach JP, Kobayashi Y. Widening Socioeconomic Inequalities in

396 Smoking in Japan, 2001-2016. J Epidemiol. 2021;31(6):369-77. Epub 20201125. doi:  
397 10.2188/jea.JE20200025. PubMed PMID: 32595181; PubMed Central PMCID:  
398 PMCPMC8126678.

399

**Figure 1. Nagamine H. et al.**

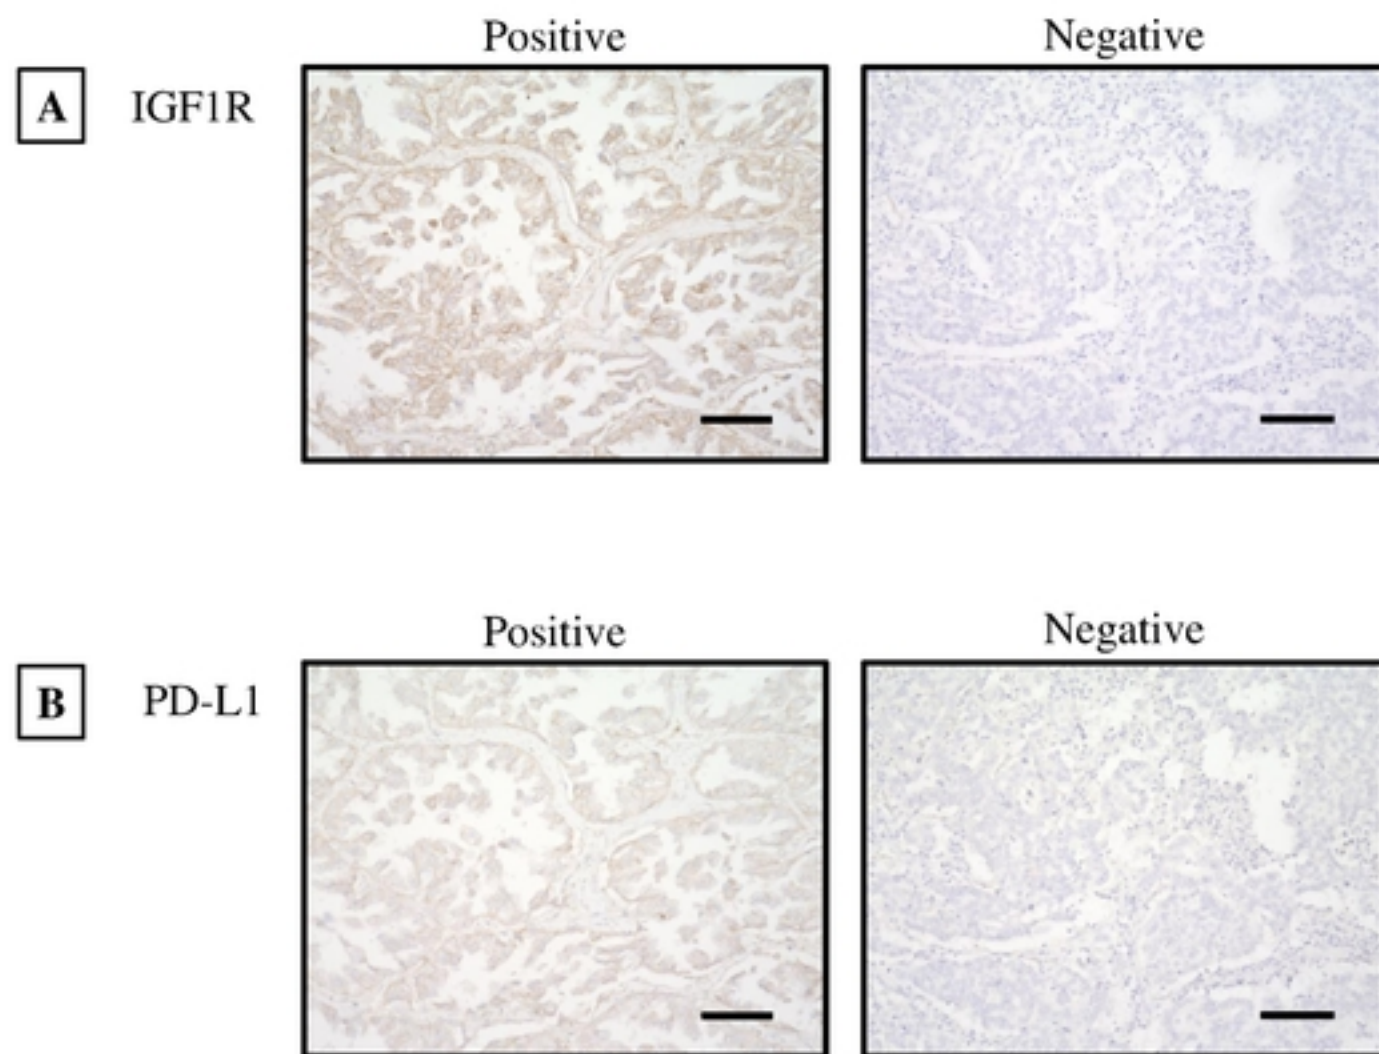

Figure1

**Figure 2. Nagamine H. et al.**

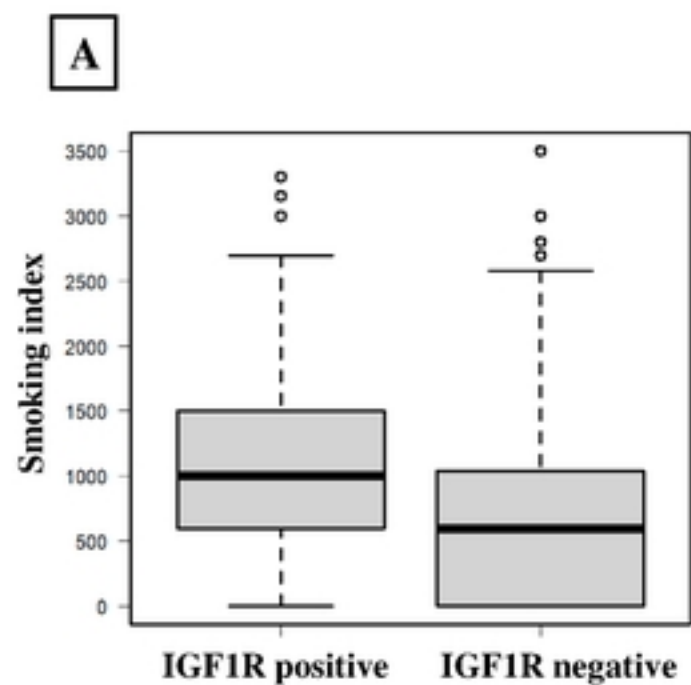

|                | n   | range  | median (IQR)    | p-value |
|----------------|-----|--------|-----------------|---------|
| IGF1R positive | 279 | 0-3300 | 1000 (600-1500) | <0.01   |
| IGF1R negative | 502 | 0-3500 | 600 (0-1035)    |         |

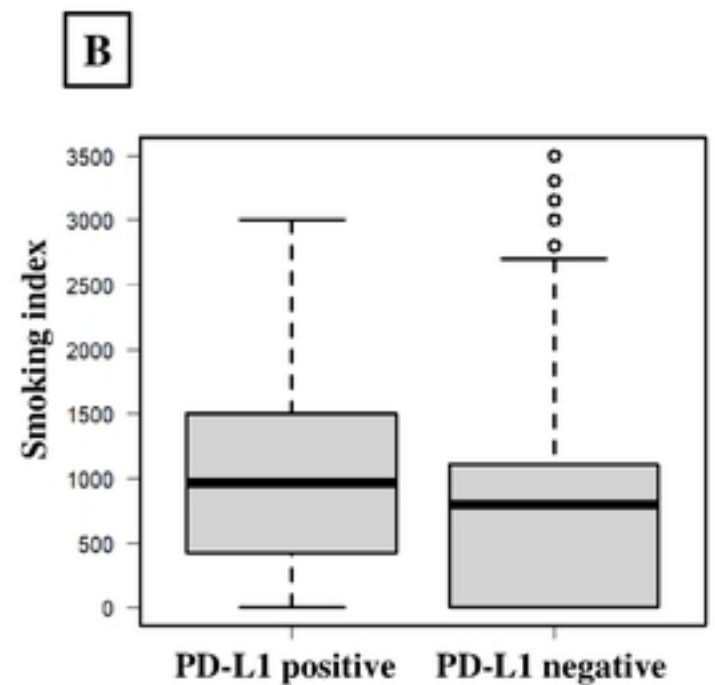

|                | n   | range  | median (IQR)     | p-value |
|----------------|-----|--------|------------------|---------|
| PD-L1 positive | 279 | 0-3000 | 970 (437.5-1500) | <0.01   |
| PD-L1 negative | 502 | 0-3500 | 800 (0-1110)     |         |

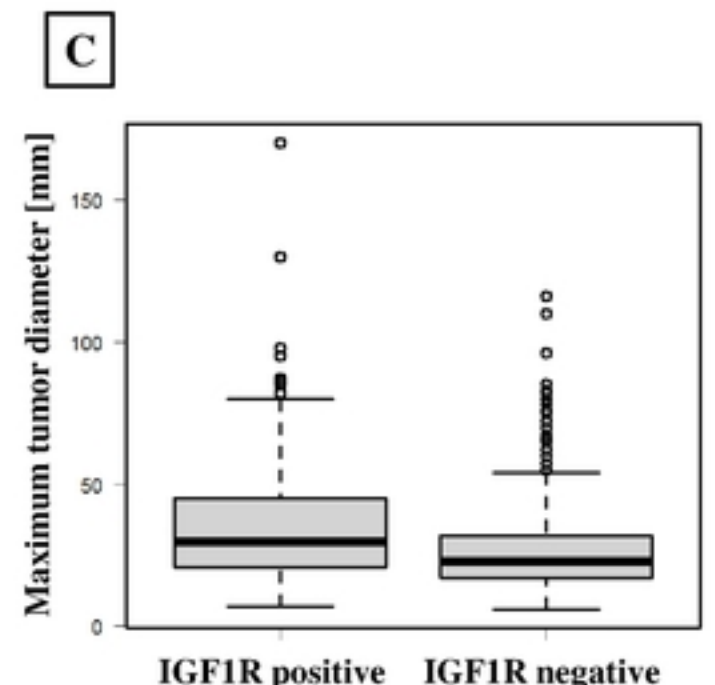

|                | n   | range | median (IQR) | p-value |
|----------------|-----|-------|--------------|---------|
| IGF1R positive | 279 | 7-170 | 30 (21-45)   | <0.01   |
| IGF1R negative | 503 | 6-116 | 23 (17-32)   |         |

Figure2

**Figure 3. Nagamine H. et al.**

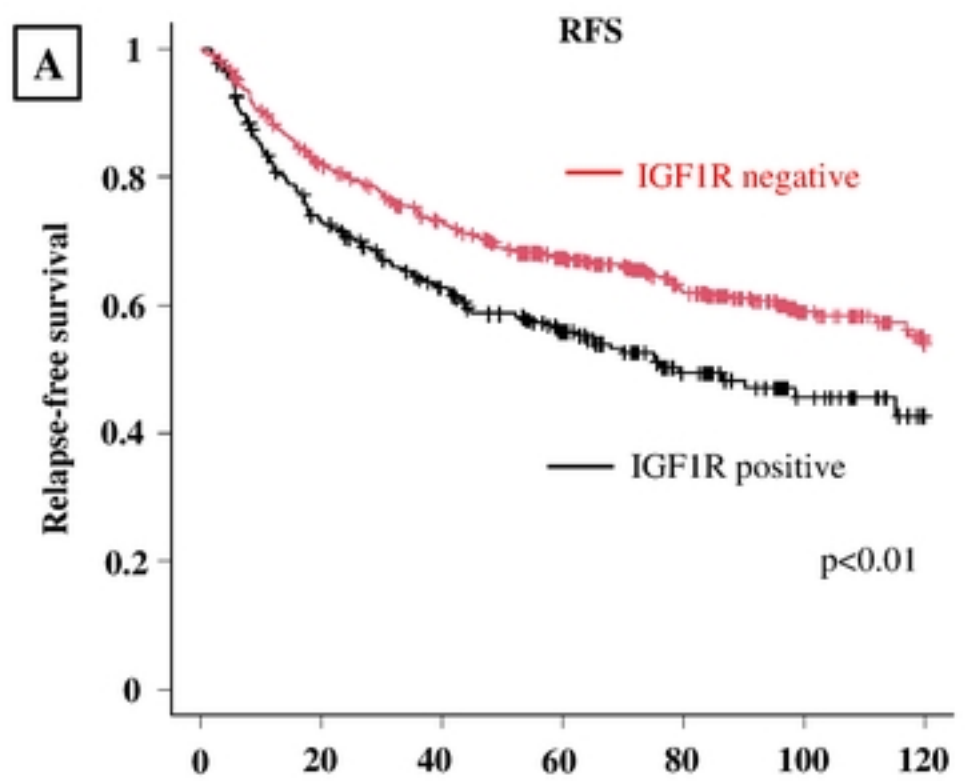

|          | Number at risk |     |     |     |     |     |     |
|----------|----------------|-----|-----|-----|-----|-----|-----|
|          | 0              | 20  | 40  | 60  | 80  | 100 | 120 |
| Positive | 279            | 196 | 152 | 103 | 55  | 28  | 0   |
| Negative | 503            | 400 | 341 | 273 | 181 | 93  | 0   |

|                | n   | Median RFS (months) | 95% CI   |
|----------------|-----|---------------------|----------|
| IGF1R positive | 279 | 79.3                | 58.9-NA  |
| IGF1R negative | 503 | NA                  | 117.5-NA |

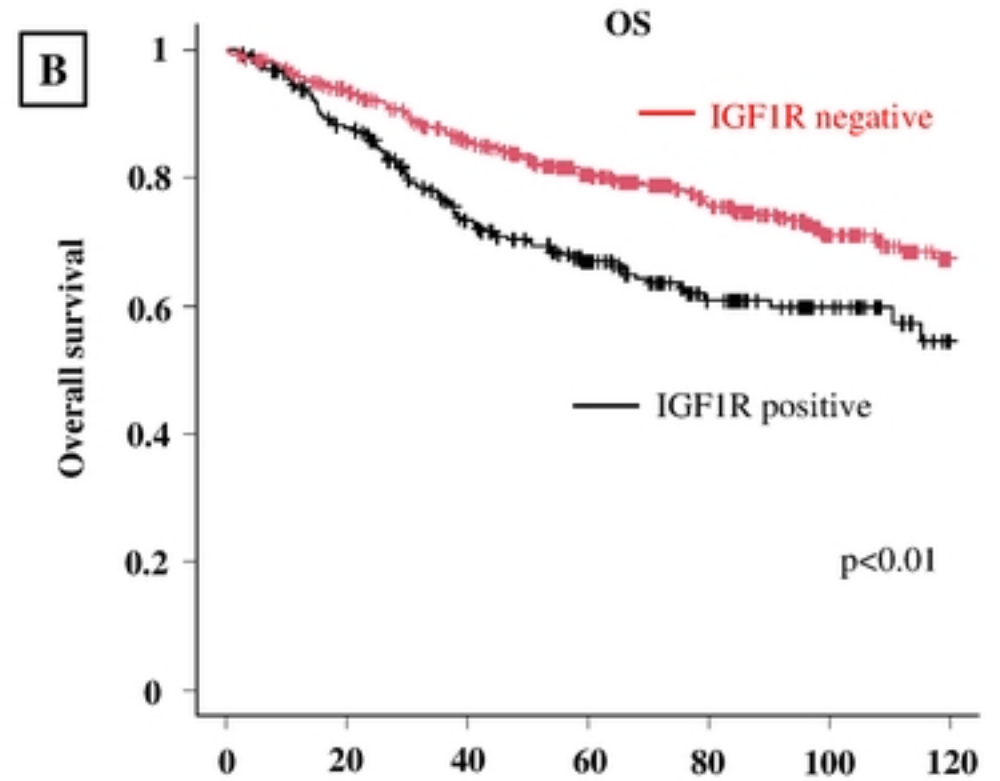

|          | Number at risk |     |     |     |     |     |     |
|----------|----------------|-----|-----|-----|-----|-----|-----|
|          | 0              | 20  | 40  | 60  | 80  | 100 | 120 |
| Positive | 279            | 232 | 172 | 118 | 64  | 36  | 0   |
| Negative | 503            | 453 | 390 | 312 | 212 | 114 | 0   |

|                | n   | Median OS (months) | 95% CI   |
|----------------|-----|--------------------|----------|
| IGF1R positive | 279 | NA                 | 110.5-NA |
| IGF1R negative | 503 | NA                 | NA-NA    |

Figure3

**Figure 4. Nagamine H. et al.**

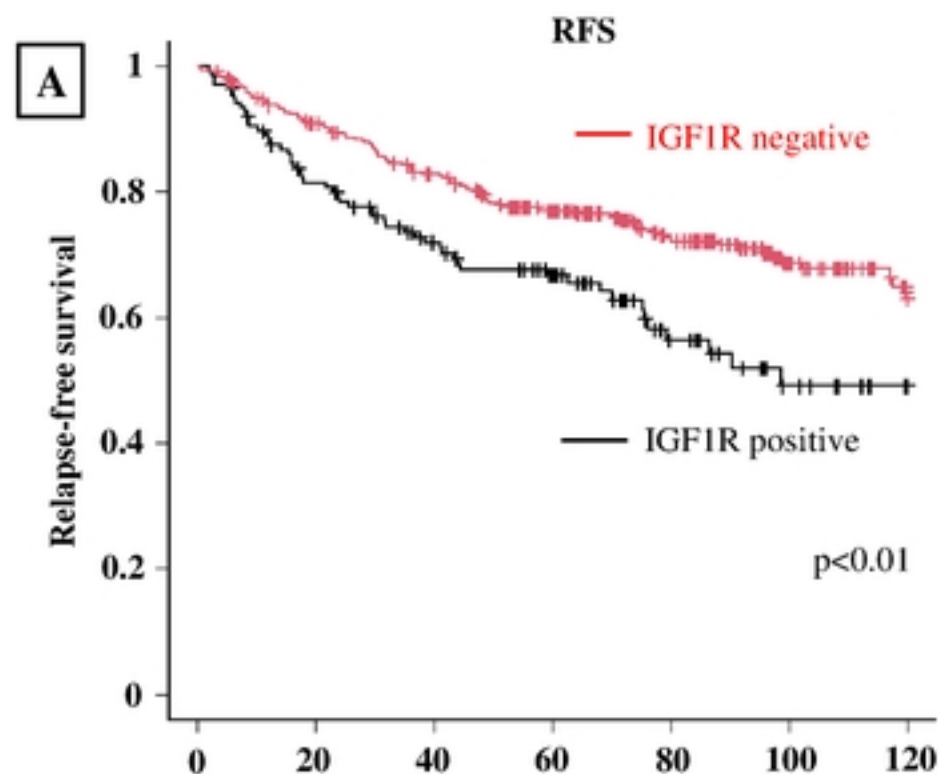

|          | Number at risk |     |     |     |     |     |     |
|----------|----------------|-----|-----|-----|-----|-----|-----|
|          | 0              | 20  | 40  | 60  | 80  | 100 | 120 |
| Positive | 137            | 107 | 85  | 62  | 31  | 16  | 0   |
| Negative | 357            | 315 | 278 | 226 | 153 | 79  | 0   |

|                | n   | Median RFS (months) | 95% CI  |
|----------------|-----|---------------------|---------|
| IGF1R positive | 137 | 98.6                | 75.4-NA |
| IGF1R negative | 357 | NA                  | NA-NA   |

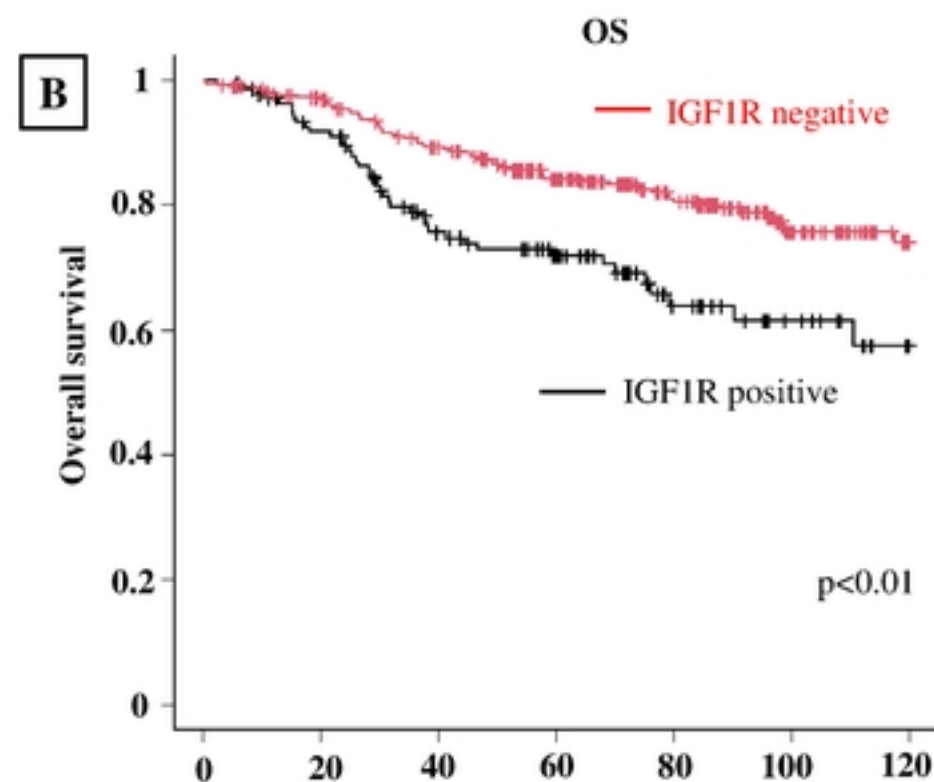

|          | Number at risk |     |     |     |     |     |     |
|----------|----------------|-----|-----|-----|-----|-----|-----|
|          | 0              | 20  | 40  | 60  | 80  | 100 | 120 |
| Positive | 137            | 119 | 88  | 65  | 33  | 20  | 0   |
| Negative | 357            | 334 | 296 | 240 | 166 | 87  | 0   |

|                | n   | Median OS (months) | 95% CI   |
|----------------|-----|--------------------|----------|
| IGF1R positive | 137 | NA                 | 110.6-NA |
| IGF1R negative | 357 | NA                 | NA-NA    |

Figure4

**Figure 5. Nagamine H. et al.**

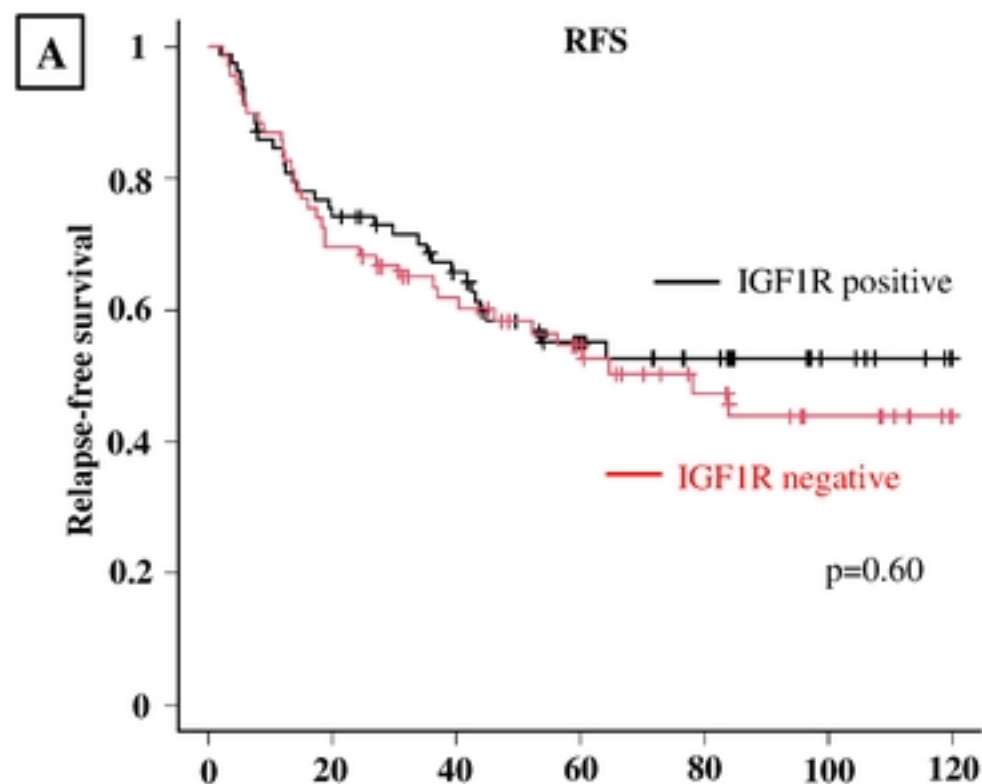

|          | Number at risk |    |    |    |    |     |     |
|----------|----------------|----|----|----|----|-----|-----|
|          | 0              | 20 | 40 | 60 | 80 | 100 | 120 |
| Positive | 78             | 58 | 45 | 27 | 17 | 8   | 0   |
| Negative | 69             | 48 | 37 | 27 | 16 | 9   | 0   |

|                | n  | Median RFS (months) | 95% CI  |
|----------------|----|---------------------|---------|
| IGF1R positive | 78 | NA                  | 43.2-NA |
| IGF1R negative | 69 | 78.3                | 37.0-NA |

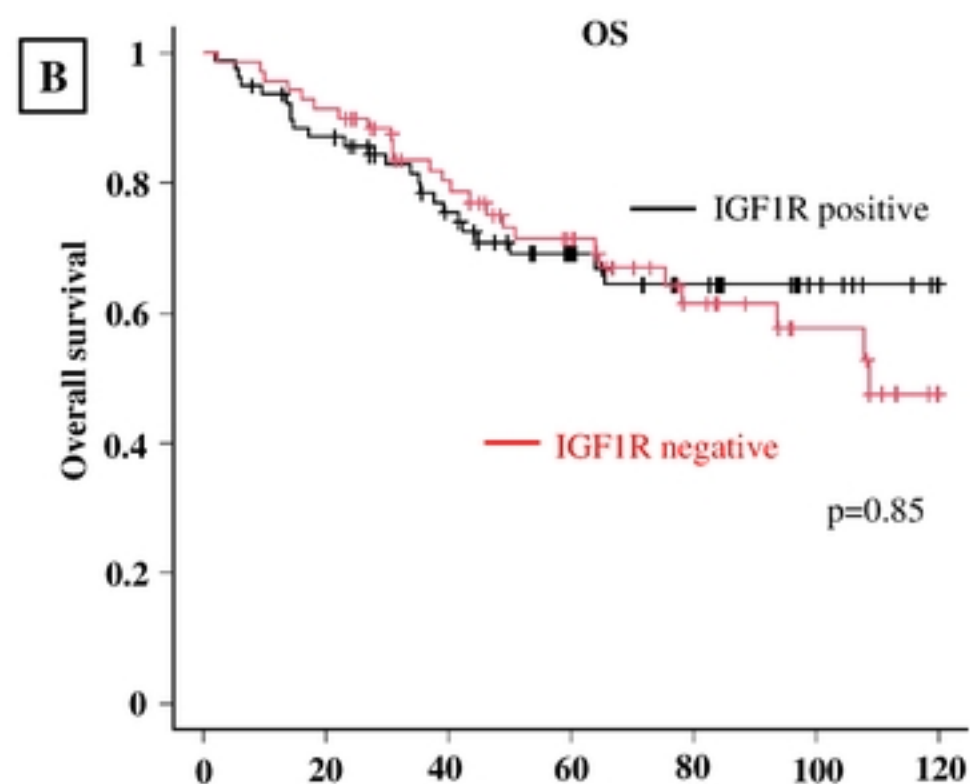

|          | Number at risk |    |    |    |    |     |     |
|----------|----------------|----|----|----|----|-----|-----|
|          | 0              | 20 | 40 | 60 | 80 | 100 | 120 |
| Positive | 78             | 66 | 50 | 33 | 20 | 10  | 0   |
| Negative | 69             | 63 | 48 | 36 | 21 | 12  | 0   |

|                | n  | Median OS (months) | 95% CI  |
|----------------|----|--------------------|---------|
| IGF1R positive | 78 | NA                 | NA-NA   |
| IGF1R negative | 69 | 108.8              | 78.3-NA |

**Figure 6. Nagamine H. et al.**

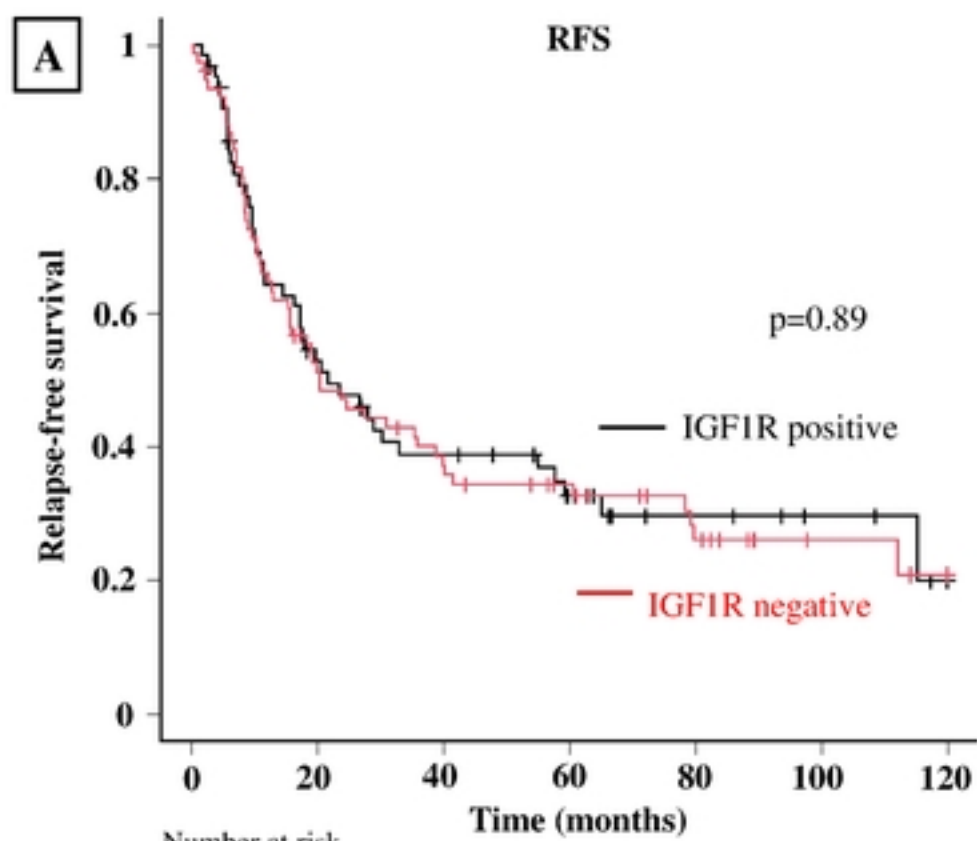

|          | 0  | 20 | 40 | 60 | 80 | 100 | 120 |
|----------|----|----|----|----|----|-----|-----|
| Positive | 64 | 31 | 22 | 14 | 7  | 4   | 0   |
| Negative | 77 | 37 | 26 | 20 | 12 | 5   | 0   |

|                | n  | Median RFS (months) | 95% CI    |
|----------------|----|---------------------|-----------|
| IGFIR positive | 64 | 21.8                | 14.6-55.0 |
| IGFIR negative | 77 | 20.4                | 13.1-39.0 |

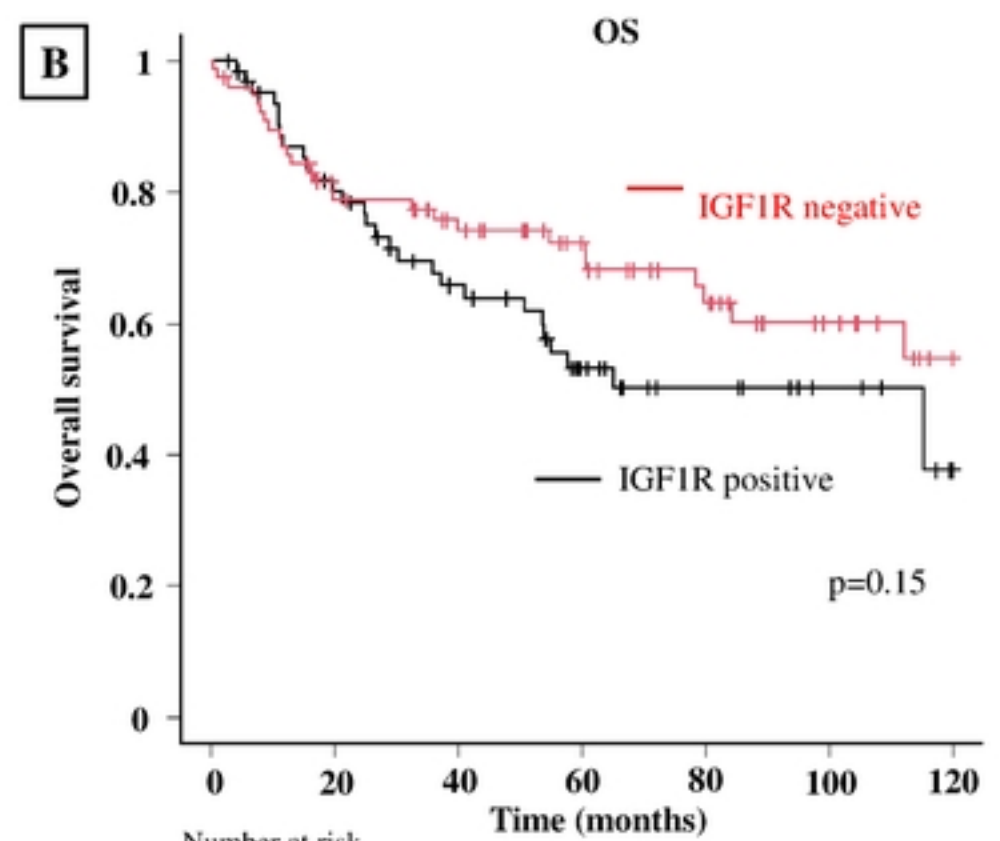

|          | 0  | 20 | 40 | 60 | 80 | 100 | 120 |
|----------|----|----|----|----|----|-----|-----|
| Positive | 64 | 47 | 34 | 20 | 11 | 6   | 0   |
| Negative | 77 | 56 | 46 | 36 | 25 | 15  | 0   |

|                | n  | Median OS (months) | 95% CI  |
|----------------|----|--------------------|---------|
| IGFIR positive | 64 | 115.3              | 50.7-NA |
| IGFIR negative | 77 | NA                 | 79.8-NA |

Figure6
